# Supplementary material for: Mutability of mononucleotide repeats, not oxidative stress, explains the discrepancy between laboratory-accumulated mutations and the natural allele-frequency spectrum in C. elegans
Source: bioRxiv preprint, doi:10.1101/2021.02.09.430480, version 2 (2021-02-11)
Supplement: Supplemental Table S1_MA backup data [file 430480_file06.xlsx]

## Sheet: Mev-1
Line↓ Gen→	1	2	3	4	5	6	7	8	9	10	11	12	13	14	15	16	17	18	19	20	21	22	23	24	25	26	27	28	29	30	31	32	33	34	35	36	37	38	39	40	41	42	43	44	45	46	47	48	49
704								h					b		h		b																		h
706																																			b
711																																								b			b
712															b																	b				b													b
715															h																																	b
721																b													b																		b	b
727			b											b										b																							h
729				h											b								b																				b
730										h																							b		b									h
733
735
737																h							b			h										h				h			h				h
738				b	b									b			b																									b					b
744				h	h		b						b						b										h
746						h					h																							h				b
748																																												b	b			h
749																							h		b	h
752									b									b		b		b									b	h									b			b			h
753																														h
759																	h	b							b																h			b		b		b
761											b														h																			h
767																				b								h	b	b			b			h
769					b			b			b																						b			h						h		h				h
770									b						b	b										b
[truncated: 81 more columns]

## Sheet: N2
Line↓ Gen→	1	2	3	4	5	6	7	8	9	10	11	12	13	14	15	16	17	18	19	20	21	22	23	24	25	26	27	28	29	30	31	32	33	34	35	36	37	38	39	40	41	42	43	44	45	46	47	48	49
501
502
503
504
505
506
507
508
509
510
511
512
513
514
515
516
517
518
519
520
521
522
523
524
525
526
527
528
529
530
531
532
533
534
535
536
537
538
539
540
541
542
543
544
545
546
547
548
549
550
551
552
553																																																h
554
555
556
557
558
559
560
561
562
563
564
565
566
567
568
569
570
571
572
573
574
575																																														h
576
577
578
579
580
581
582																																														h		h
583
584
585
586
587
588
589
590
591
592
593
594
595
596
597
598
599
600
[truncated: 210 more columns]

## Sheet: PB306
Line↓ Gen→	1	2	3	4	5	6	7	8	9	10	11	12	13	14	15	16	17	18	19	20	21	22	23	24	25	26	27	28	29	30	31	32	33	34	35	36	37	38	39	40	41	42	43	44	45	46	47	48	49
401
402
403
404																																												h
405
406
407
408																																														h
409
410
411
412
413
414
415
416
417																																									h
418
419
420
421
422
423
424
425
426
427
428
429
430
431
432
433
434
435
436
437
438
439
440
441
442
443
444
445
446
447
448
449
450
451
452
453
454
455
456
457
458
459
460
461																																									h
462
463
464
465
466
467
468
469
470
471
472
473
474																																																h
475
476
477
478																																									h						h
479
480
481
482
483
484
485
486
487
488
489
490
491
492
493
494
495
496
497
498
499
500
[truncated: 210 more columns]

## Sheet: Readme
The three preceding worksheets show the the outcome of the transfer of a worm in each MA line at each generation. In all three strains, transfers occurred at four-day intervals. Rows are MA lines, columns are transfers at a given generation of MA (1→Gmax). A blank cell indicates a successful transfer. A cell with a "b" (for "backup") indicates that the worm was either dead, missing, or obviously …
